# Supplementary material
Source: publisher figshare collection journal article supplement (https://acs.figshare.com/ndownloader/files/5185261)

## Supporting Information

### Novel Dolabellane-type Diterpene Alkaloids with Lipid Metabolism Promoting Activities from the Seeds of *Nigella sativa*

Toshio Morikawa, Fengming Xu, Yousuke Kashima, Hisashi Matsuda, Kiyofumi Ninomiya, and Masayuki Yoshikawa\*

*Kyoto Pharmaceutical University, Misasagi, Yamashina-ku, Kyoto 607-8412, Japan*

#### Table of Contents

Experimental Section

Spectrum Data for Desacyl Derivatives of **1** (**1a—c**)

Spectrum Data for Desacyl Derivatives of **2** (**2a—e**)

Spectrum Data for Reductants of **3** and **4** (**3a** and **4a**)

Spectrum Data for Desacyl Derivatives of **3a** (**3b—d**)

<sup>1</sup>H and <sup>13</sup>C NMR Spectra of **1**

<sup>1</sup>H and <sup>13</sup>C NMR Spectra of **2**

<sup>1</sup>H and <sup>13</sup>C NMR Spectra of **3**

<sup>1</sup>H and <sup>13</sup>C NMR Spectra of **4**

**General Experimental Procedures.** The following instruments were used to obtain physical data: specific rotations, Horiba SEPA-300 digital polarimeter ( $l=5$  cm); CD spectra, JASCO J-720WI spectrometer; UV spectra, Shimadzu UV-1600 spectrometer; IR spectra, Shimadzu FTIR-8100 spectrometer;  $^1\text{H}$  NMR spectra, JEOL JNM LA-500 (500 MHz) spectrometer;  $^{13}\text{C}$  NMR spectra, JEOL JNM LA-500 (125 MHz) spectrometer with tetramethylsilane as an internal standard; FABMS and HRFABMS, JEOL JMS-SX 102A mass spectrometer; EIMS, CIMS, HREIMS, and HRCIMS, JEOL JMS-GCMATE mass spectrometer; HPLC detector, Shimadzu RID-6A refractive index and SPD-10Avp UV-VIS detectors.

The following experimental conditions were used for chromatography: normal-phase silica gel column chromatography, Silica gel BW-200 (Fuji Silysia Chemical, 150–350 mesh); reversed-phase silica gel column chromatography, Chromatorex ODS DM1020T (Fuji Silysia Chemical, 100–200 mesh); HPLC column, YMC-Pack ODS-A (YMC, 250 × 20 mm i.d.); TLC, pre-coated TLC plates with Silica gel 60F<sub>254</sub> (Merck, 0.25 mm) (normal-phase) and Silica gel RP-18 F<sub>254S</sub> (Merck, 0.25 mm) (reversed-phase); reversed-phase HPTLC, pre-coated TLC plates with Silica gel RP-18 WF<sub>254S</sub> (Merck, 0.25 mm); detection was achieved by spraying with 1% Ce(SO<sub>4</sub>)<sub>2</sub>–10% aqueous H<sub>2</sub>SO<sub>4</sub> followed by heating.

**Extraction and Isolation.** The seeds of *N. sativa* (10.0 kg, collected in Egypt) were extracted with methanol 3 times under reflux for 3 h. Evaporation of the solvent under reduced pressure provided the methanolic extract (1740 g, 17.4% from this natural medicine). The methanolic extract (1245 g) was partitioned into an EtOAc and water mixture to give an EtOAc-soluble fraction (723 g, 10.1%) and an aqueous phase (522 g, 7.3%). The EtOAc-soluble fraction (285 g) was subjected to ordinary-phase silica gel column chromatography [3.0 kg, *n*-hexane–EtOAc (20:1–10:1–5:1–2:1–1:2)–CHCl<sub>3</sub>–MeOH–H<sub>2</sub>O (20:3:1, lower layer–6:4:1)–MeOH] to give 12 fractions [Fr. 1 (12.36 g), 2 (55.91 g), 3 (74.90 g), 4 (18.51 g), 5 (61.82 g), 6 (2.55 g), 7 (0.97 g), 8 (9.68 g), 9 (6.69 g), 10 (8.13 g), 11 (15.82 g), and 12 (16.57 g)]. Fraction 7 (0.97 g) was subjected to reversed-phase silica gel column chromatography [30 g, MeOH–H<sub>2</sub>O (50:50–70:30–85:15, v/v)–MeOH] to give seven fractions [Fr. 7-1 (112 mg), 7-2 (105 mg), 7-3 (68 mg), 7-4 (315 mg), 7-5 (87 mg), 7-6 (152 mg), and 7-7 (120 mg)]. Fraction 7-4 (315 mg) was further separated by HPLC [YMC-Pack ODS-5-A, 250×20 mm i.d., MeOH–H<sub>2</sub>O (85:15, v/v)] to give nigellamine A<sub>1</sub> (**1**, 271 mg, 0.0096% from the natural medicine). Fraction 7-6 (152 mg) was purified by HPLC [MeOH–H<sub>2</sub>O (80:20, v/v)] to give nigellamine B<sub>1</sub> (**3**, 33 mg, 0.0012%). Fraction 9 (6.69 g) was subjected to reversed-phase silica gel column chromatography [200 g, MeOH–H<sub>2</sub>O (40:60–60:40–80:20, v/v)–MeOH] to give ten fractions [Fr. 9-1 (1.150 g), 9-2 (943 mg), 9-3 (627 mg), 9-4 (1.312 g), 9-5 (142 mg), 9-6 (750 mg), 9-7 (150 mg), 9-8 (241 mg), 9-9 (805 mg), and 9-10 (428 mg)]. Fraction 9-6 (750 mg) was purified by HPLC [MeOH–H<sub>2</sub>O (75:25, v/v)] to give nigellamine B<sub>2</sub> (**4**, 102 mg, 0.0036%). Fraction 9-9 (805 mg) was purified by HPLC [MeOH–H<sub>2</sub>O (80:20, v/v)] to give nigellamine A<sub>2</sub> (**2**, 221 mg, 0.0078%).

**Treatment of Nigellamine A<sub>1</sub> (1) with 0.1% NaOMe–MeOH.** A solution of **1** (10.0 mg) in 0.1% NaOMe–MeOH (2.0 mL) was stirred at room temperature for 8 h. From the reaction mixture, methyl nicotinate (**i**) and methyl benzoate (**ii**) were identified by HPLC analyses [ $t_r$  (**i**): 5.58, (**ii**): 15.80 min, detection: UV (254 nm), column: YMC-Pack ODS-5-A, 250×4.6 mm i.d., mobile phase: MeOH–H<sub>2</sub>O (60:40, v/v); flow rate 0.7 ml/min (standard samples were obtained by diazomethane methylation of commercial nicotinic acid and benzoic acid)].

Then the reaction mixture was neutralized with Dowex HCR-W2 (H<sup>+</sup> form) and the resin was removed by filtration. Evaporation of the solvent from the filtrate under reduced pressure furnished a residue, which was purified by HPLC [detection: RI, column: YMC-Pack ODS-5-A, 250×20 mm i.d., mobile phase: MeOH–H<sub>2</sub>O (60:40, v/v)] to give **1a** (4.0 mg, 77%).

On the other hand, a solution of **1** (15.0 mg) in 0.1% NaOMe–MeOH (2.0 mL) was stirred at 0°C for 3.5 h. The reaction mixture was poured into ice-water and the whole was extracted with EtOAc. The EtOAc extract was successively washed with brine then dried over MgSO<sub>4</sub> powder and filtrated. Evaporation of the solvent from the filtrate under reduced pressure furnished a residue, which was purified by HPLC [detection: RI, column: YMC-Pack ODS-5-A, 250×20 mm i.d., mobile phase: MeOH–H<sub>2</sub>O (80:20, v/v)] to give **1b** (4.1 mg, 40%) and 10-desacyl derivative (**1c**, 4.8 mg, 38%).

**1a:** A white powder,  $[a]_D^{23} +33.9^\circ$  ( $c=0.20$ , MeOH). IR (KBr): 3304, 3240, 1655, 1561, 1509, 1375, 1122, 1038, 1017, 953, 777, 718 cm<sup>-1</sup>. <sup>13</sup>C NMR (CD<sub>3</sub>OD):  $\delta_C$  59.5 (C-1), 71.9 (C-2), 129.4 (C-3), 136.5 (C-4), 38.8 (C-5), 23.9 (C-6), 67.4 (C-7), 60.9 (C-8), 46.5 (C-9), 74.4 (C-10), 49.8 (C-11), 141.5 (C-12), 28.7 (C-13), 29.4 (C-14), 62.7 (C-15), 16.4 (C-16), 18.8 (C-17), 124.5 (C-18), 22.3 (C-19), 22.4 (C-20).

**1b:** A white powder,  $[a]_D^{24} +36.3^\circ$  ( $c=0.40$ , CHCl<sub>3</sub>). High resolution positive-ion FAB-MS: Calcd for C<sub>27</sub>H<sub>37</sub>O<sub>5</sub> (M+H)<sup>+</sup>: 441.2641. Found: 441.2650. UV (MeOH, log  $\epsilon$ ): 230 (4.10), 273 (2.91) nm. IR (KBr): 3325, 1717, 1636, 1603, 1541, 1509, 1451, 1271, 1111, 1071, 1026, 953, 754, 714 cm<sup>-1</sup>. <sup>13</sup>C NMR (CDCl<sub>3</sub>):  $\delta_C$  57.6 (C-1), 73.7 (C-2), 123.3 (C-3), 139.1 (C-4), 37.9 (C-5), 22.8 (C-6), 65.9 (C-7), 59.4 (C-8), 44.8 (C-9), 73.6 (C-10), 48.4 (C-11), 138.4 (C-12), 28.3 (C-14), 27.5 (C-14), 61.5 (C-15), 16.2 (C-16), 18.5 (C-17), 124.9 (C-18), 21.9 (C-19), 22.3 (C-20), 130.2 (C-1'), 129.6 (C-2',6'), 128.5 (C-3',5'), 133.1 (C-4'), 165.9 (C-7'). Positive-ion FAB-MS:  $m/z$  441 (M+H)<sup>+</sup>.

**1c:** A white powder,  $[a]_D^{24} +29.8^\circ$  ( $c=0.50$ , CHCl<sub>3</sub>). High resolution positive-ion FAB-MS: Calcd for C<sub>34</sub>H<sub>41</sub>O<sub>6</sub> (M+H)<sup>+</sup>: 545.2903. Found: 545.2906. UV (MeOH, log  $\epsilon$ ): 228 (4.46), 274 (3.30) nm. IR (KBr): 3517, 1717, 1647, 1636, 1603, 1541, 1509, 1451, 1281, 1113, 1069, 1026, 953, 756, 712 cm<sup>-1</sup>. <sup>1</sup>H NMR (CDCl<sub>3</sub>):  $\delta$  1.40, 1.74, 1.79 (3H each, all s, H<sub>3</sub>-17, 19, 20), 1.52 (1H, dd,  $J = 12.8, 13.5$  Hz, H $\beta$ -9), 1.66 (1H, m, H $\alpha$ -6), 1.82 (3H, d,  $J = 0.9$  Hz, H<sub>3</sub>-16), 1.97 (1H, m, H $\beta$ -6), 2.20 (2H, m, H<sub>2</sub>-14), 2.31 (2H, m, H<sub>2</sub>-13), 2.37 (1H, dd,  $J = 5.5, 13.5$  Hz, H $\alpha$ -9), 2.39 (1H, m, H $\alpha$ -5), 2.43 (1H, ddd,  $J = 5.2, 12.8, 12.8$  Hz, H $\beta$ -5), 2.51 (1H, br s, H-11), 3.02 (1H, br d,  $J = ca. 9$  Hz, H-7), 4.21 (1H, m, H-10), 4.76, 5.25 (1H each, both d,  $J = 11.0$  Hz, H<sub>2</sub>-15), 5.40 (1H, d,  $J = 10.1$  Hz, H-2), 5.62 (1H, dd,  $J = 0.9, 10.1$  Hz, H-3), 7.19 (2H, dd,  $J = 7.6, 8.3$  Hz, H-3',5'), 7.42 (2H, dd,  $J = 7.6, 8.3$  Hz, H-3'',5''), 7.45 (1H, tt,  $J = 1.2, 7.6$  Hz, H-4'), 7.58 (1H, tt,  $J = 1.2, 7.6$  Hz, H-4''), 7.87 (2H, dd,  $J = 1.2, 8.3$  Hz, H-2',6'), 8.07 (2H, dd,  $J = 1.2, 8.3$  Hz, H-2'',6''). <sup>13</sup>C NMR (CDCl<sub>3</sub>):  $\delta_C$  56.2 (C-1), 73.2 (C-2), 123.7

(C-3), 139.4 (C-4), 37.8 (C-5), 22.9 (C-6), 65.6 (C-7), 58.9 (C-8), 45.4 (C-9), 73.5 (C-10), 49.1 (C-11), 137.8 (C-12), 28.5 (C-13), 30.5 (C-14), 66.5 (C-15), 16.4 (C-16), 18.5 (C-17), 125.8 (C-18), 21.9 (C-19), 22.5 (C-20), 130.0 (C-1'), 129.6 (C-2',6'), 128.2 (C-3',5'), 132.8 (C-4'), 166.3 (C-7'), 130.3 (C-1'''), 129.8 (C-2''',6'''), 128.5 (C-3''',5'''), 133.1 (C-4'''), 166.3 (C-7'''). Positive-ion FAB-MS:  $m/z$  545 (M+H)<sup>+</sup>.

**Treatment of Nigellamine A<sub>2</sub> (2) with 0.1% NaOMe–MeOH.** A solution of **2** (10.0 mg) in 0.1% NaOMe–MeOH (2.0 mL) was stirred at room temperature for 8 h. From the reaction mixture, methyl nicotinate and methyl benzoate were identified by HPLC analyses and **1a** (3.8 mg, 74%) was purified by the similar procedure.

On the other hand, a solution of **2** (5.0 mg) in 0.1% NaOMe–MeOH (1.0 mL) was stirred at 0°C for 2 h. The reaction mixture was poured into ice-water and the whole was extracted with EtOAc. The EtOAc extract was successively washed with brine then dried over MgSO<sub>4</sub> powder and filtrated. Evaporation of the solvent from the filtrate under reduced pressure furnished a residue, which was purified by HPLC [detection: RI, column: YMC-Pack ODS-5-A, 250×20 mm i.d., mobile phase: MeOH–H<sub>2</sub>O (80:20, v/v)] to give **2a** (0.1 mg, 3%), 10-desacyl derivative (**2b**, 1.8 mg, 43%), 2-desacyl derivative (**2c**, 1.0 mg, 24%), 2,15-desacyl derivative (**2d**, 0.2 mg, 6%), 2,10-desacyl derivative (**2e**, 0.4 mg, 12%), and **1a** (0.3 mg, 9%).

**2a:** A white powder.

**2b:** A white powder. High resolution EI-MS: Calcd for C<sub>33</sub>H<sub>39</sub>NO<sub>6</sub> (M<sup>+</sup>): 545.2777. Found: 545.2781. <sup>1</sup>H NMR (CD<sub>3</sub>OD):  $\delta$  1.41, 1.76, 1.83 (3H each, all s, H<sub>3</sub>-17, 19, 20), 1.45 (1H, dd,  $J = 12.5, 13.5$  Hz, H $\beta$ -9), 1.76 (1H, m, H $\alpha$ -6), 1.79 (3H, d,  $J = 1.2$  Hz, H<sub>3</sub>-16), 1.92 (1H, m, H $\beta$ -6), 2.24 (2H, m, H<sub>2</sub>-14), 2.32 (2H, m, H<sub>2</sub>-13), 2.39, 2.57 (1H each, both m, H<sub>2</sub>-5), 2.45 (1H, br s, H-11), 2.48 (1H, dd,  $J = 5.8, 13.5$  Hz, H $\alpha$ -9), 3.09 (1H, d-like, H-7), 4.22 (1H, br dd,  $J = ca. 6, 13$  Hz, H-10), 4.77, 5.33 (1H each, both d,  $J = 10.7$  Hz, H<sub>2</sub>-15), 5.49 (1H, d,  $J = 10.4$  Hz, H-2), 5.77 (1H, d,  $J = ca. 10$  Hz, H-3), 7.10 (1H, dd,  $J = 4.8, 7.9$  Hz, H-5'), 7.42 (2H, dd,  $J = 7.7, 8.4$  Hz, H-3''', 5'''), 7.61 (1H, br t,  $J = ca. 8$  Hz, H-4'''), 7.97 (1H, ddd,  $J = 1.2, 2.1, 7.9$  Hz, H-6'), 8.04 (2H, dd,  $J = 1.7, 8.4$  Hz, H-2''', 6'''), 8.59 (1H, br s, H-4'), 8.92 (1H, br s, H-2'). EI-MS (%):  $m/z$  545 (M<sup>+</sup>, 2), 423 (3), 300 (72), 121 (59), 105 (100).

**2c:** A white powder. High resolution EI-MS: Calcd for C<sub>33</sub>H<sub>39</sub>NO<sub>6</sub> (M<sup>+</sup>): 545.2777. Found: 545.2772. <sup>1</sup>H NMR (CD<sub>3</sub>OD):  $\delta$  1.50, 1.65, 1.86 (3H each, all s, H<sub>3</sub>-17, 19, 20), 1.62 (1H, dd,  $J = 12.2, 13.2$  Hz, H $\beta$ -9), 1.72 (3H, d,  $J = 1.2$  Hz, H<sub>3</sub>-16), 1.76, 1.91 (1H each, both m, H<sub>2</sub>-6), 2.27, 2.48 (1H, each, both m, H<sub>2</sub>-14), 2.32 (2H, m, H<sub>2</sub>-13), 2.47 (1H, dd,  $J = 5.5, 13.2$  Hz, H $\alpha$ -9), 2.48, 2.53 (1H each, both m, H<sub>2</sub>-5), 2.60 (1H, br s, H-11), 3.08 (1H, br d,  $J = ca. 9$  Hz, H-7), 4.04 (1H, d,  $J = 10.7$  Hz, H-2), 4.97, 5.02 (1H each, both d,  $J = 11.3$  Hz, H<sub>2</sub>-15), 5.68 (1H, dd,  $J = 5.5, 11.0$  Hz, H-10), 5.69 (1H, br d,  $J = ca. 11$  Hz, H-3), 7.37 (2H, dd,  $J = 7.8, 8.5$  Hz, H-3''', 5'''), 7.53 (1H, m, H-5'''), 7.53 (1H, tt,  $J = 1.2, 7.8$  Hz, H-4'''), 8.08 (2H, dd,  $J = 1.2, 8.5$  Hz, H-2''', 6'''), 8.38 (1H, ddd,  $J = 1.9, 2.2, 8.0$  Hz, H-6'''), 8.71 (1H, br s, H-4'''), 9.11 (1H, br s, H-2'''). EI-MS (%):  $m/z$  545 (M<sup>+</sup>, 2), 527 (M<sup>+</sup>–H<sub>2</sub>O, 1), 423 (29), 300 (45), 121 (100), 105 (95).

**2d:** A white powder. High resolution EI-MS: Calcd for C<sub>26</sub>H<sub>35</sub>NO<sub>5</sub> (M<sup>+</sup>): 441.2515. Found: 441.2520. <sup>1</sup>H NMR (CD<sub>3</sub>OD):  $\delta$  1.42 (1H, dd,  $J = 13.1, 15.3$  Hz, H $\beta$ -9), 1.45, 1.63, 1.82 (3H

each, all s, H<sub>3</sub>-17, 19, 20), 1.67 (3H, d, *J* = 1.2 Hz, H<sub>3</sub>-16), 1.75, 1.88 (1H each, both m, H<sub>2</sub>-6), 1.99, 2.23 (1H, each, both m, H<sub>2</sub>-14), 2.34 (2H, m, H<sub>2</sub>-13), 2.34, 2.63 (1H each, both m, H<sub>2</sub>-5), 2.45 (1H, dd-like, H $\alpha$ -9), 2.48 (1H, br s, H-11), 3.06 (1H, br d, *J* = ca. 9 Hz, H-7), 3.97, 4.06 (1H each, both d, *J* = 10.7 Hz, H<sub>2</sub>-15), 4.49 (1H, d, *J* = 10.4 Hz, H-2), 5.58 (1H, dd, *J* = 5.8, 13.5 Hz, H-10), 5.67 (1H, br d, *J* = ca. 10 Hz, H-3), 7.60 (1H, m, H-5''), 8.38 (1H, br d, *J* = ca. 8 Hz, H-6''), 8.79 (1H, br s, H-4''), 9.13 (1H, br s, H-2''). EI-MS (%): *m/z* 441 (M<sup>+</sup>, 1), 423 (M<sup>+</sup>-H<sub>2</sub>O, 6), 300 (25), 121 (100).

**2e**: A white powder. High resolution positive-ion FAB-MS: Calcd for C<sub>27</sub>H<sub>37</sub>O<sub>5</sub> (M+H)<sup>+</sup>: 441.2641. Found: 441.2642. <sup>1</sup>H NMR (CD<sub>3</sub>OD):  $\delta$  1.37, 1.73, 1.77 (3H each, all s, H<sub>3</sub>-17, 19, 20), 1.66 (3H, d, *J* = 1.2 Hz, H<sub>3</sub>-16), 2.52 (1H, br s, H-11), 3.03 (1H, br d, *J* = ca. 10 Hz, H-7), 3.98 (1H, d, *J* = 10.3 Hz, H-2), 4.14 (1H, m, H-10), 4.70, 4.98 (1H each, both d, *J* = 10.7 Hz, H<sub>2</sub>-15), 5.59 (1H, br d, *J* = ca. 10 Hz, H-3), 7.46 (2H, dd, *J* = 7.8, 8.2 Hz, H-3''',5'''), 7.58 (1H, t-like, H-4'''), 8.07 (2H, dd, *J* = 1.2, 8.2 Hz, H-2''',6'''). Positive-ion FAB-MS: *m/z* 441 (M+H)<sup>+</sup>.

**Triphenylphosphine (PPh<sub>3</sub>) Reduction of Nigellamines B<sub>1</sub> (3) and B<sub>2</sub> (4).** A solution of **3** (20.0 mg) or **4** (15.0 mg) in CH<sub>2</sub>Cl<sub>2</sub> (1.0 mL) was treated with PPh<sub>3</sub> (20.0 mg), and the mixture was stirred at 0 °C for 30 min. Removal of the solvent from the filtrate under reduced pressure furnished a residue, which was purified by HPLC [detection: RI, column: YMC-Pack ODS-5-A, 250×20 mm i.d., mobile phase: MeOH-H<sub>2</sub>O (80:20 or 75:25, v/v)] to give **3a** (13.2 mg, 68% from **3**) or **4a** (9.4 mg, 64% from **4**), respectively.

**3a**: A white powder, [ $\alpha$ ]<sub>D</sub><sup>24</sup> +22.8° (*c*=0.20, CHCl<sub>3</sub>). High resolution EI-MS: Calcd for C<sub>40</sub>H<sub>43</sub>NO<sub>8</sub> (M<sup>+</sup>): 665.2988. Found: 665.2995. CD (MeOH,  $\Delta\epsilon$ ): +8.01 (216 nm), -1.54 (236 nm). UV (MeOH, log  $\epsilon$ ): 226 (4.52), 264 (3.68) nm. IR (KBr): 3517, 1717, 1647, 1636, 1592, 1453, 1279, 1115, 1026, 941, 756, 712 cm<sup>-1</sup>. <sup>13</sup>C NMR (CDCl<sub>3</sub>):  $\delta$ <sub>C</sub> 54.6 (C-1), 73.3 (C-2), 122.6 (C-3), 141.1 (C-4), 38.1 (C-5), 23.0 (C-6), 66.8 (C-7), 59.0 (C-8), 41.4 (C-9), 73.9 (C-10), 52.0 (C-11), 149.0 (C-12), 125.2 (C-13), 38.2 (C-14), 66.2 (C-15), 17.4 (C-16), 17.1 (C-17), 71.5 (C-18), 32.1 (C-19), 32.5 (C-20), 129.8 (C-1'), 129.4 (C-2',6'), 127.9 (C-3',5'), 132.5 (C-4'), 166.2 (C-7'), 125.5 (C-1''), 150.7 (C-2''), 153.5 (C-4''), 123.3 (C-5''), 137.0 (C-6''), 164.9 (C-7''), 130.0 (C-1'''), 129.9 (C-2''',6'''), 128.2 (C-3''',5'''), 132.9 (C-4'''), 166.3 (C-7'''). EI-MS (%): *m/z* 665 (M<sup>+</sup>, 13), 122 (100).

**4a**: A white powder, [ $\alpha$ ]<sub>D</sub><sup>26</sup> +22.8° (*c*=0.40, CHCl<sub>3</sub>). High resolution Positive-ion FAB-MS: Calcd for C<sub>39</sub>H<sub>43</sub>N<sub>2</sub>O<sub>8</sub> (M+H)<sup>+</sup>: 667.3019. Found: 667.3022. CD (MeOH,  $\Delta\epsilon$ ): +7.37 (221 nm), -0.41 (256 nm). UV (MeOH, log  $\epsilon$ ): 222 (4.58), 264 (3.94) nm. IR (KBr): 3415, 1717, 1647, 1636, 1592, 1456, 1283, 1113, 1026, 745, 714 cm<sup>-1</sup>. <sup>13</sup>C NMR (CDCl<sub>3</sub>):  $\delta$ <sub>C</sub> 54.8 (C-1), 74.1 (C-2), 122.4 (C-3), 141.9 (C-4), 38.2 (C-5), 23.0 (C-6), 66.9 (C-7), 59.1 (C-8), 41.5 (C-9), 74.0 (C-10), 52.1 (C-11), 149.5 (C-12), 125.2 (C-13), 38.3 (C-14), 66.2 (C-15), 17.4 (C-16), 17.1 (C-17), 71.6 (C-18), 32.2 (C-19), 32.7 (C-20), 126.0 (C-1'), 150.9 (C-2'), 153.2 (C-4'), 122.9 (C-5'), 136.9 (C-6'), 165.2 (C-7'), 125.6 (C-1''), 150.9 (C-2''), 153.6 (C-4''), 123.8 (C-5''), 137.3 (C-6''), 165.1 (C-7''), 130.1 (C-1'''), 129.9 (C-2''',6'''), 128.6 (C-3''',5'''), 133.3 (C-4'''). Positive-ion FAB-MS: *m/z* 667 (M+H)<sup>+</sup>.

**Treatment of 3a with 0.1% NaOMe–MeOH.** A solution of **3a** (5.0 mg) in 0.1% NaOMe–MeOH (2.0 mL) was stirred at room temperature for 8 h. From the reaction mixture, methyl nicotinate and methyl benzoate were identified by HPLC analyses and **3b** (1.9 mg, 72%) was purified by the similar procedure.

On the other hand, a solution of **3a** (8.0 mg) in 0.1% NaOMe–MeOH (2.0 mL) was stirred at 0°C for 3.5 h. The reaction mixture was poured into ice-water and the whole was extracted with EtOAc. The EtOAc extract was successively washed with brine then dried over MgSO<sub>4</sub> powder and filtrated. Evaporation of the solvent from the filtrate under reduced pressure furnished a residue, which was purified by HPLC [detection: RI, column: YMC-Pack ODS-5-A, 250×20 mm i.d., mobile phase: MeOH–H<sub>2</sub>O (80:20, v/v)] to give **3c** (2.3 mg, 42%) and 10-desacyl derivative (**3d**, 2.5 mg, 37%).

**3b:** A white powder,  $[\alpha]_D^{24} +35.6^\circ$  ( $c=0.10$ , MeOH). High resolution EI-MS: Calcd for C<sub>20</sub>H<sub>30</sub>O<sub>4</sub> (M<sup>+</sup>–H<sub>2</sub>O): 334.2144. Found: 334.2140. IR (KBr): 3346, 1653, 1559, 1507, 1387, 1262, 1120, 1044, 938, 756, 718 cm<sup>-1</sup>. <sup>13</sup>C NMR (CDCl<sub>3</sub>):  $\delta_C$  56.3 (C-1), 72.3 (C-2), 127.6 (C-3), 137.3 (C-4), 38.1 (C-5), 23.0 (C-6), 66.6 (C-7), 59.5 (C-8), 43.3 (C-9), 70.1 (C-10), 52.4 (C-11), 149.1 (C-12), 126.2 (C-13), 36.4 (C-14), 63.6 (C-15), 16.8 (C-16), 17.5 (C-17), 71.6 (C-18), 33.0 (C-19), 33.2 (C-20). EI-MS (%):  $m/z$  334 (M<sup>+</sup>–H<sub>2</sub>O, 1), 120 (100).

**3c:** A white powder,  $[\alpha]_D^{24} +32.9^\circ$  ( $c=0.20$ , CHCl<sub>3</sub>). High resolution positive-ion CI-MS: Calcd for C<sub>27</sub>H<sub>37</sub>O<sub>6</sub> (M+H)<sup>+</sup>: 457.2590. Found: 457.2587. UV (MeOH, log  $\epsilon$ ): 230 (3.93), 273 (2.84) nm. IR (KBr): 3368, 1717, 1636, 1601, 1584, 1453, 1279, 1098, 1026, 938, 756, 714 cm<sup>-1</sup>. <sup>13</sup>C NMR (CDCl<sub>3</sub>):  $\delta_C$  56.6 (C-1), 74.5 (C-2), 122.8 (C-3), 140.0 (C-4), 38.0 (C-5), 23.0 (C-6), 66.8 (C-7), 59.4 (C-8), 43.1 (C-9), 70.2 (C-10), 52.4 (C-11), 148.5 (C-12), 126.3 (C-13), 34.7 (C-14), 61.1 (C-15), 16.8 (C-16), 17.7 (C-17), 71.6 (C-18), 32.7 (C-19), 33.1 (C-20), 130.2 (C-1'), 129.6 (C-2',6'), 128.5 (C-3',5'), 133.1 (C-4'), 166.0 (C-7'). Positive-ion CI-MS:  $m/z$  457 (M+H)<sup>+</sup>.

**3d:** A white powder,  $[\alpha]_D^{24} +18.2^\circ$  ( $c=0.20$ , CHCl<sub>3</sub>). High resolution positive-ion CI-MS: Calcd for C<sub>34</sub>H<sub>41</sub>O<sub>7</sub> (M+H)<sup>+</sup>: 561.2852. Found: 561.2869. UV (MeOH, log  $\epsilon$ ): 228 (4.11), 274 (3.03) nm. IR (KBr): 3517, 1717, 1647, 1603, 1559, 1451, 1283, 1117, 1026, 941, 756, 712 cm<sup>-1</sup>. <sup>1</sup>H NMR (CDCl<sub>3</sub>):  $\delta$  1.38, 1.54, 1.56 (3H each, all s, H<sub>3</sub>-17, 19, 20), 1.62 (1H, m, H $\beta$ -9), 1.66 (1H, m, H $\alpha$ -6), 1.89 (3H, d,  $J = 0.9$  Hz, H<sub>3</sub>-16), 1.96 (1H, m, H $\beta$ -6), 2.32 (1H, m, H $\alpha$ -5), 2.41 (1H, dd,  $J = 5.5, 13.5$  Hz, H $\alpha$ -9), 2.44 (1H, ddd,  $J = 4.9, 12.5, 12.5$  Hz, H $\beta$ -5), 2.64 (1H, dd,  $J = 3.1, 17.7$  Hz, H $\alpha$ -14), 2.73 (1H, br d,  $J = ca. 18$  Hz, H $\beta$ -14), 2.75 (1H, br s, H-11), 2.95 (1H, br d,  $J = ca. 10$  Hz, H-7), 4.62 (1H, br dd,  $J = ca. 6, 13$  Hz, H-10), 4.87, 5.29 (1H each, both d,  $J = 11.0$  Hz, H<sub>2</sub>-15), 5.46 (1H, d,  $J = 10.4$  Hz, H-2), 5.67 (1H, dd,  $J = 0.9, 10.4$  Hz, H-3), 5.73 (1H, br s, H-13), 7.12 (2H, dd,  $J = 7.7, 8.3$  Hz, H-3',5'), 7.42 (1H, tt,  $J = 1.3, 7.7$  Hz, H-4'), 7.43 (2H, dd,  $J = 7.7, 8.3$  Hz, H-3'',5''), 7.58 (1H, tt,  $J = 1.3, 7.7$  Hz, H-4''), 7.82 (2H, dd,  $J = 1.3, 8.3$  Hz, H-2',6'), 8.07 (2H, dd,  $J = 1.3, 8.3$  Hz, H-2'',6''). <sup>13</sup>C NMR (CDCl<sub>3</sub>):  $\delta_C$  54.3 (C-1), 73.9 (C-2), 123.1 (C-3), 140.6 (C-4), 38.1 (C-5), 22.9 (C-6), 66.6 (C-7), 59.4 (C-8), 43.8 (C-9), 70.0 (C-10), 53.2 (C-11), 149.6 (C-12), 125.5 (C-13), 37.9 (C-14), 65.7 (C-15), 17.0 (C-16), 17.5 (C-17), 71.7 (C-18), 33.1 (C-19), 33.2 (C-20), 130.1 (C-1'), 129.6 (C-2',6'), 128.1 (C-3',5'), 132.8 (C-4'), 166.4 (C-7'), 130.4 (C-1''), 129.8 (C-2'',6''), 128.5 (C-3'',5''), 133.0 (C-4''), 166.4 (C-7''). Positive-ion CI-MS:  $m/z$  561 (M+H)<sup>+</sup>.

**Treatment of 4a with 0.1% NaOMe–MeOH.** A solution of **4a** (6.0 mg) in 0.1% NaOMe–MeOH (2.0 mL) was stirred at room temperature for 8 h. From the reaction mixture, methyl nicotinate and methyl benzoate were identified by HPLC analyses and **3b** (2.1 mg, 66%) was purified by the similar procedure.

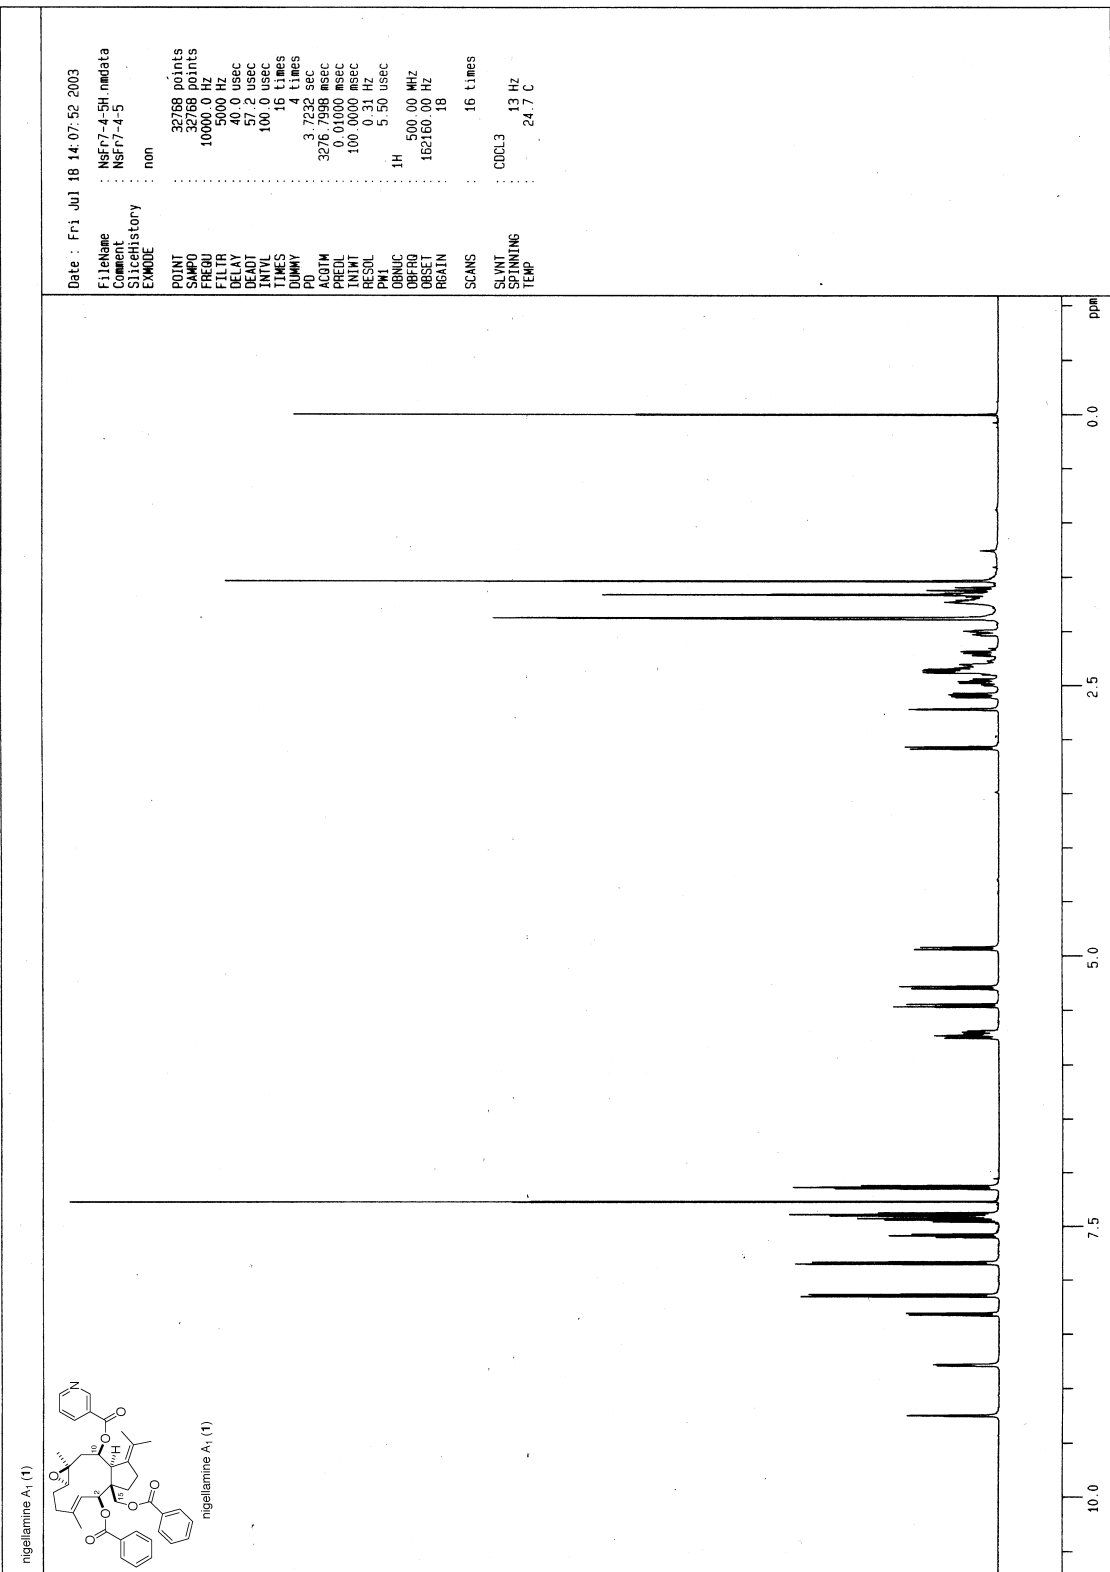



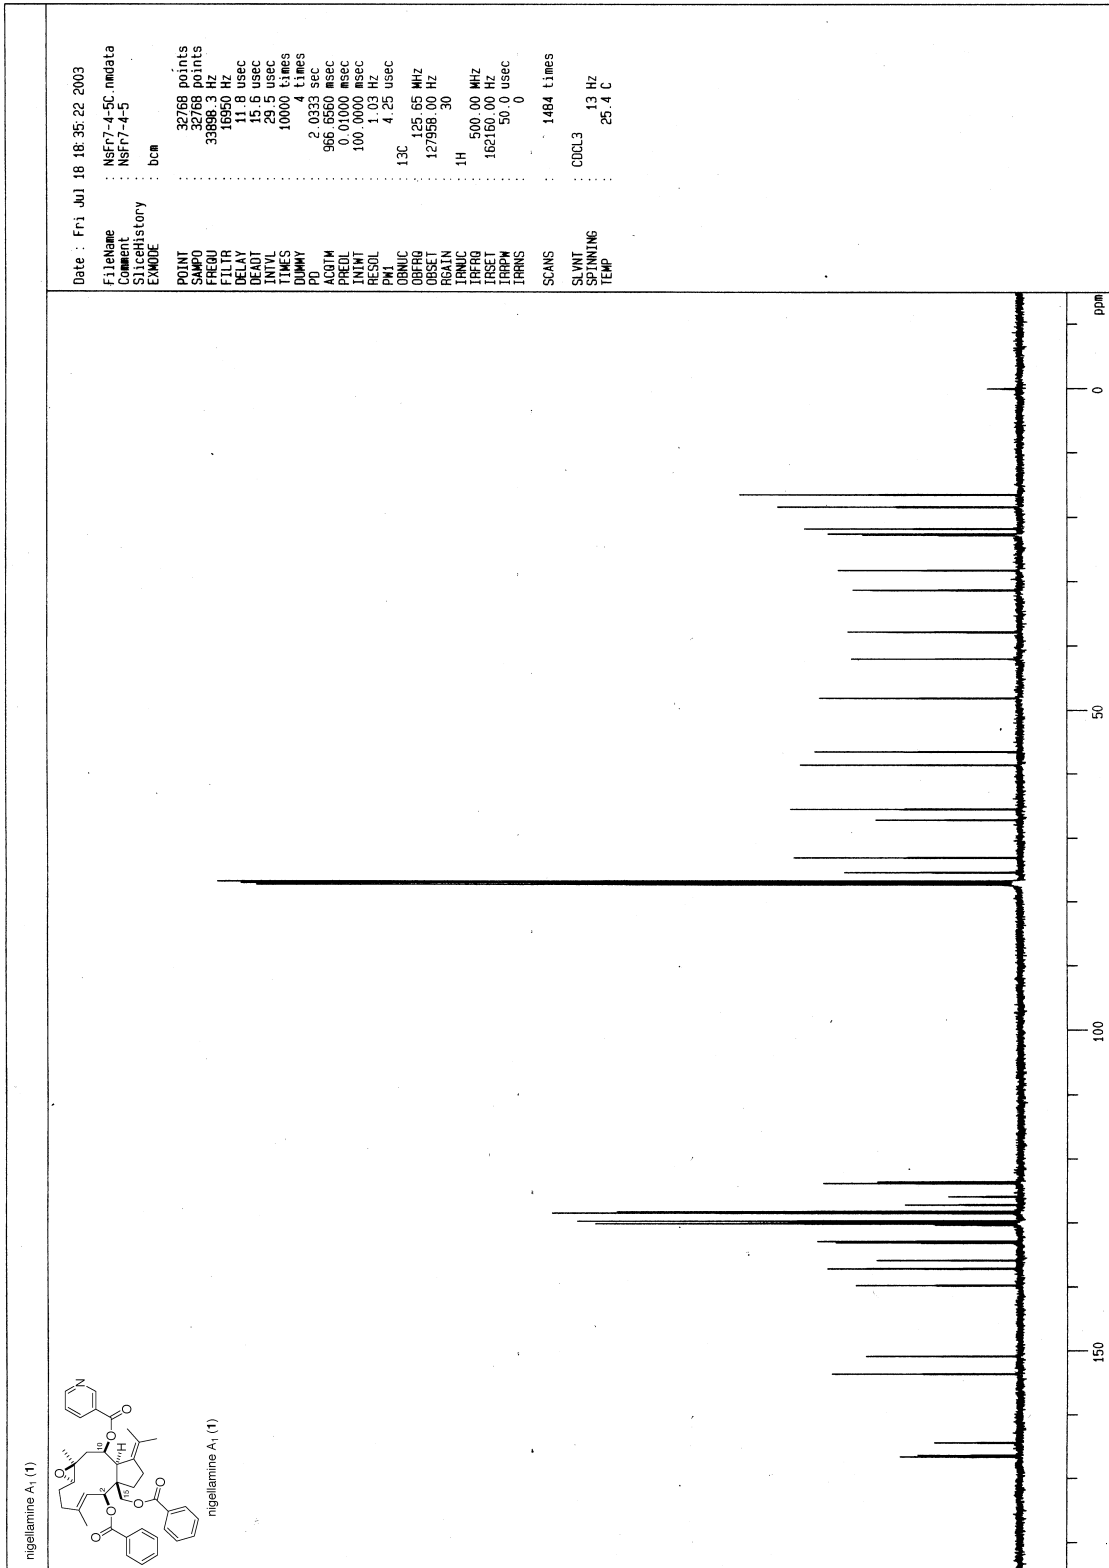

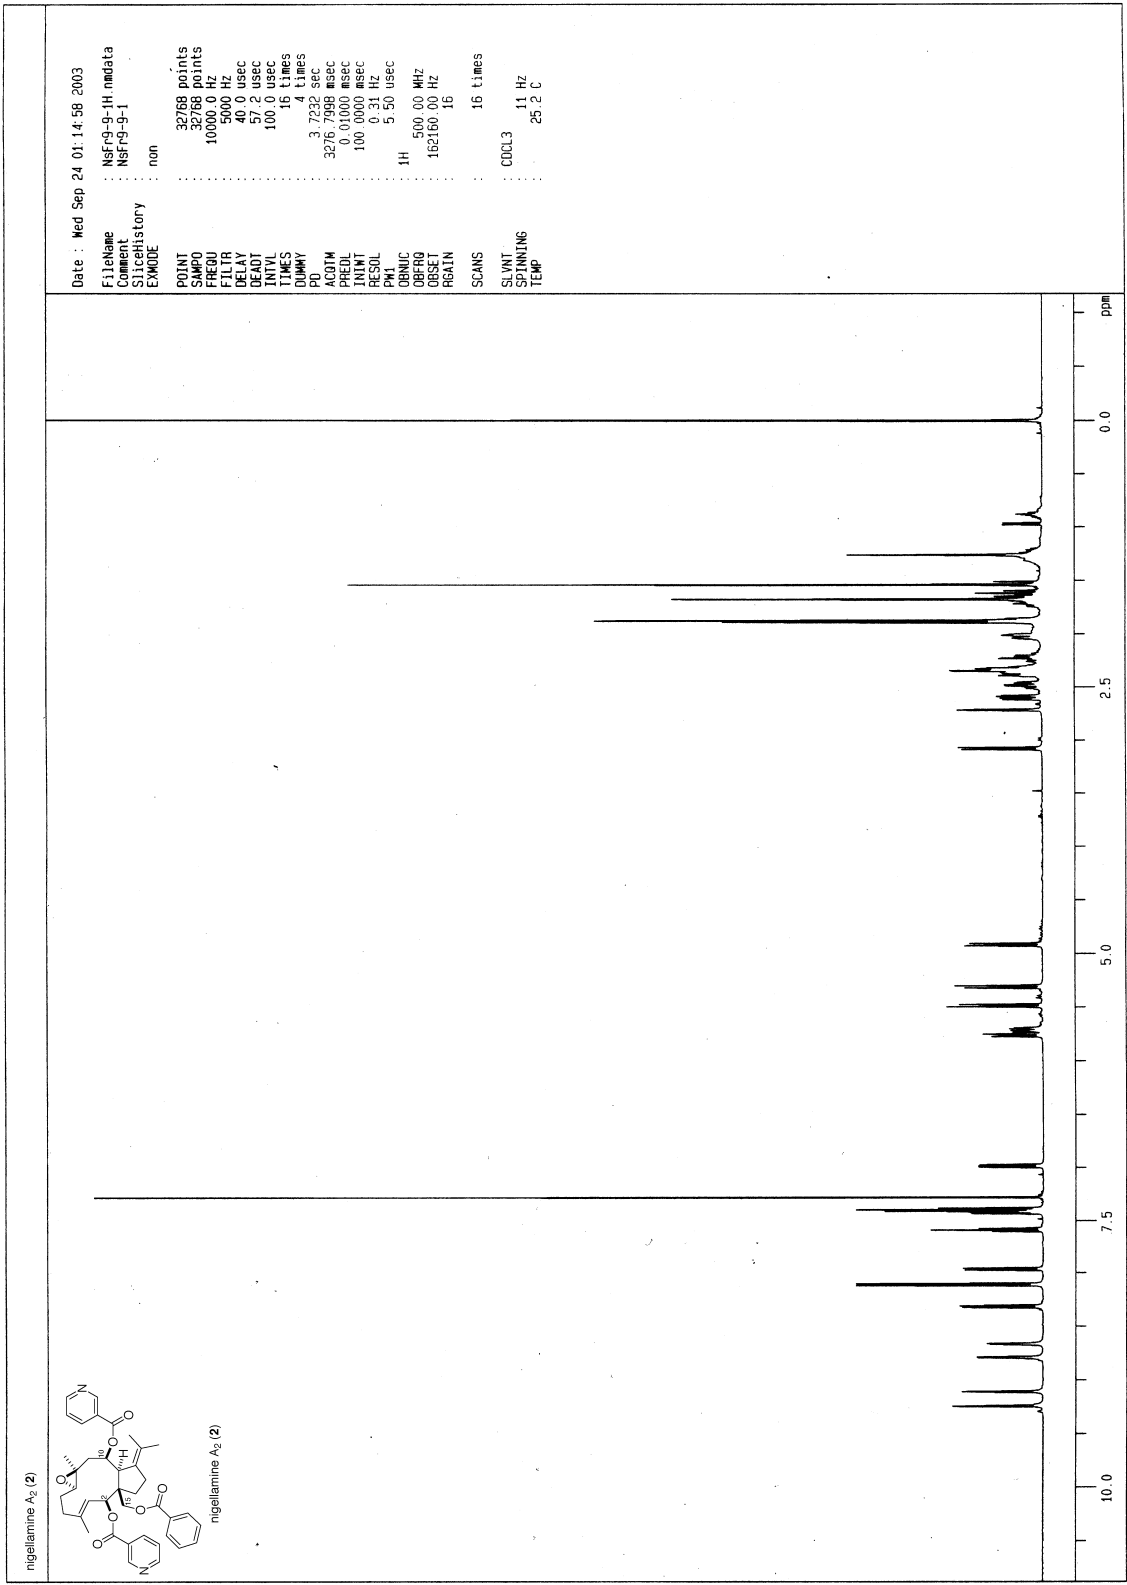

nigellamine A<sub>2</sub> (2)

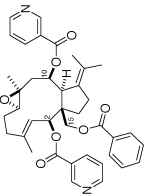

Date : Wed Sep 24 01:57:07 2003  
FileName : NsFR9-9-1C.mdata  
Comment : NsFR9-9-1  
SliceHistory :  
EXMODE : bcm

POINT 32768 points  
SAMPD 32768 points  
FREQD 398560 Hz  
PULPR 11.8 Hz  
DELAY 15.6 usec  
DEADT 29.5 usec  
INVTL 10000 times  
TIMES 4 Times  
DUMMY 2.0333 sec  
PD 966.6560 msec  
ACQTH 0.01000 msec  
PREDL 100.0000 msec  
ININT 1.03 Hz  
RESOL 4.25 usec  
P1NUC 13C  
ORNUC 125.65 MHz  
ORPRD 127958.00 Hz  
ORSET 30  
RGAIN 1H  
IRNUC 500.00 MHz  
IRPRD 162899.90 Hz  
IRSET 50.0 usec  
IRPPM 0  
IRFNS 705 times  
SCANS  
SLVNT CDCL3  
SPINNING 11 Hz  
TEMP 26.1 C

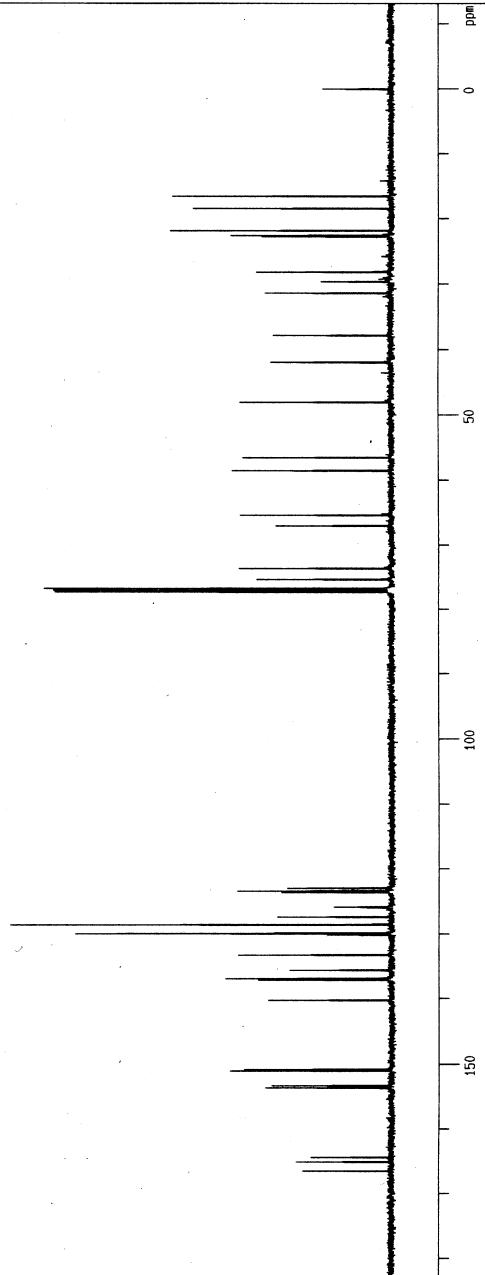

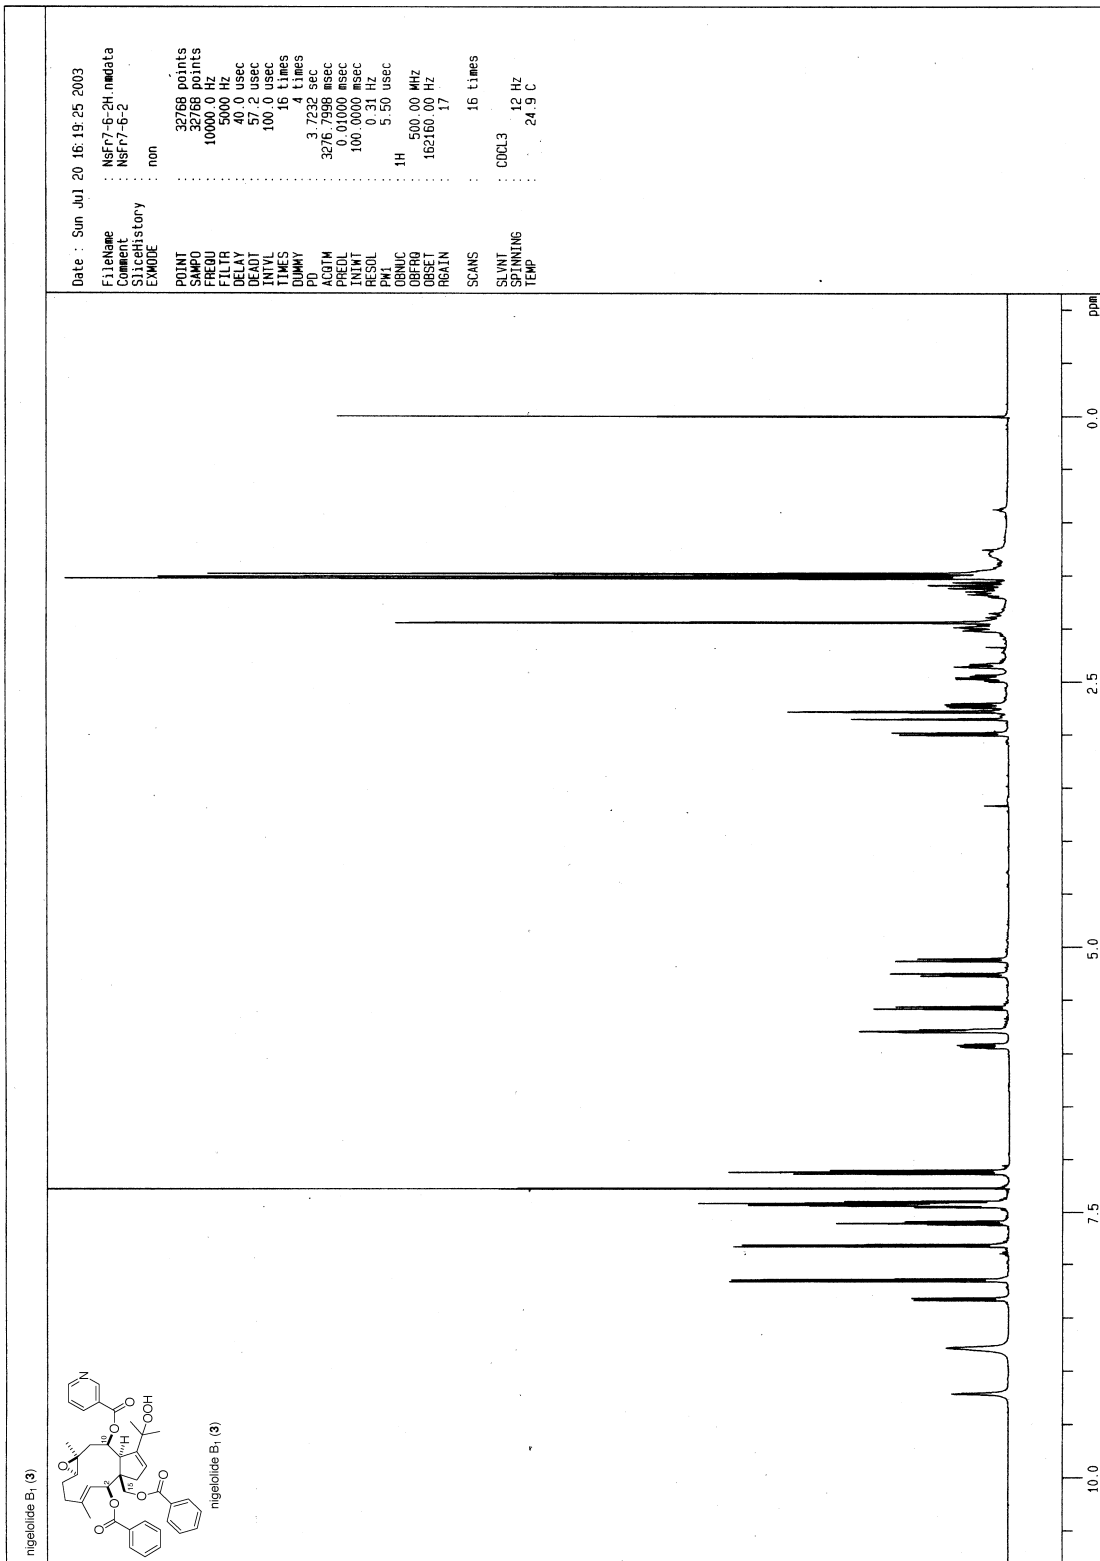

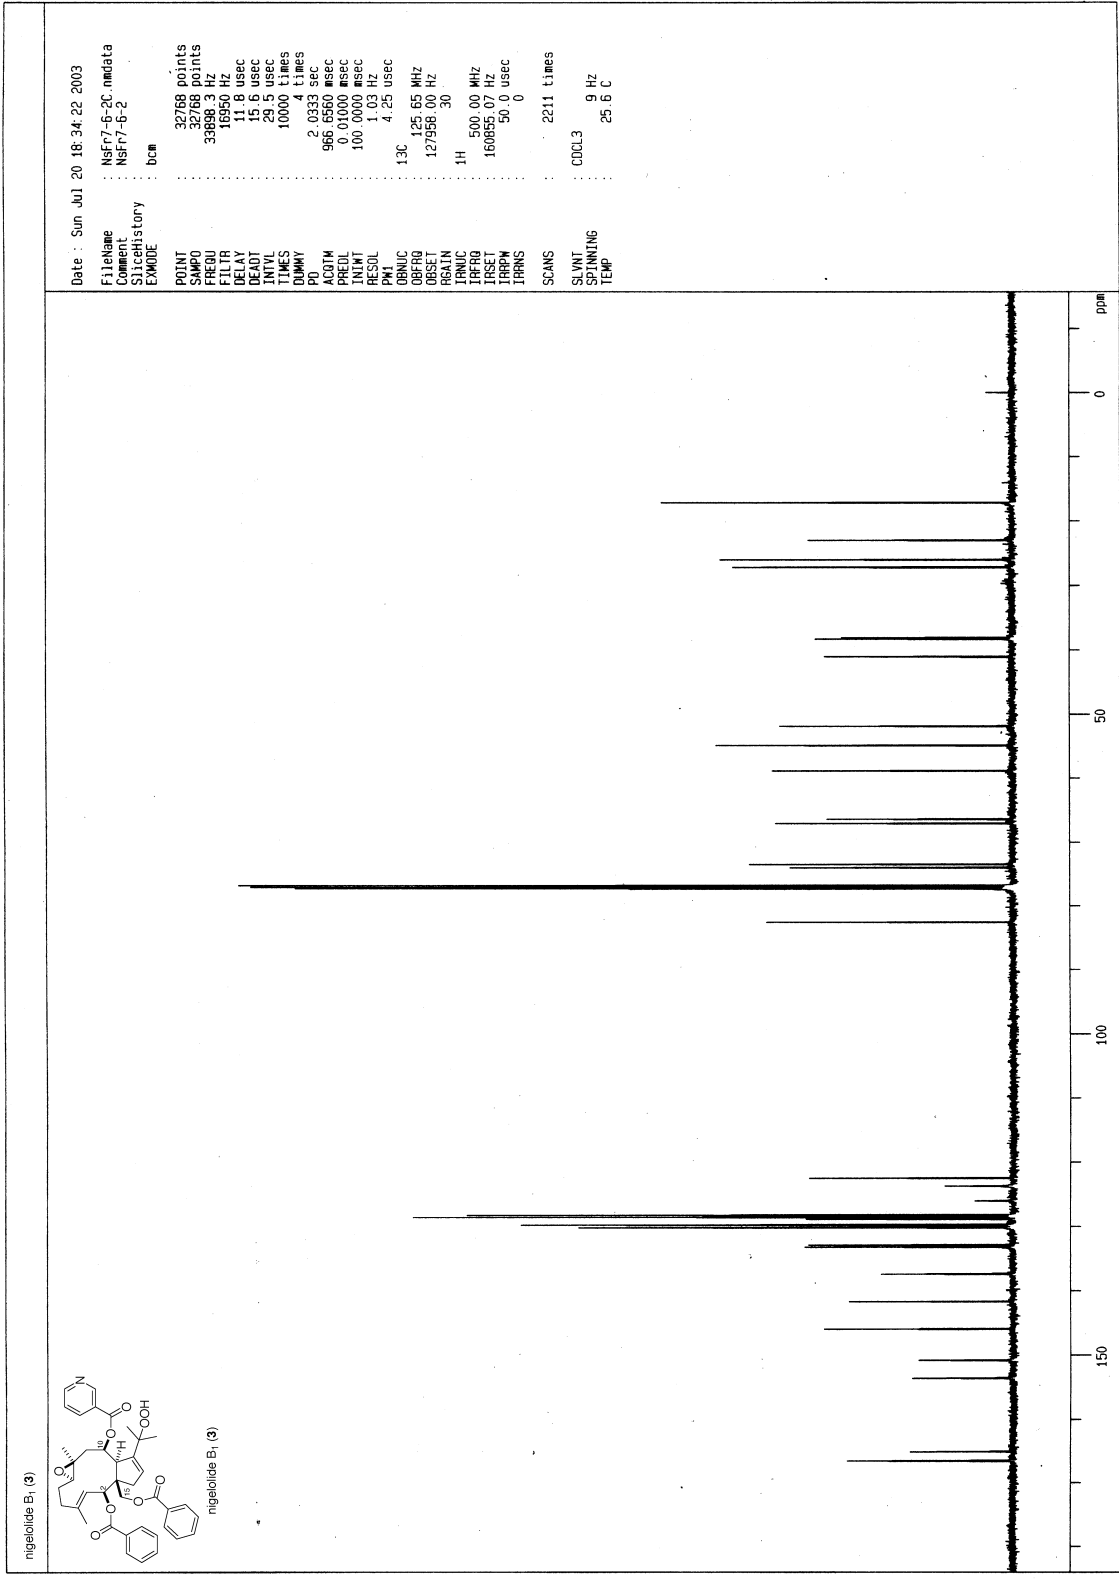

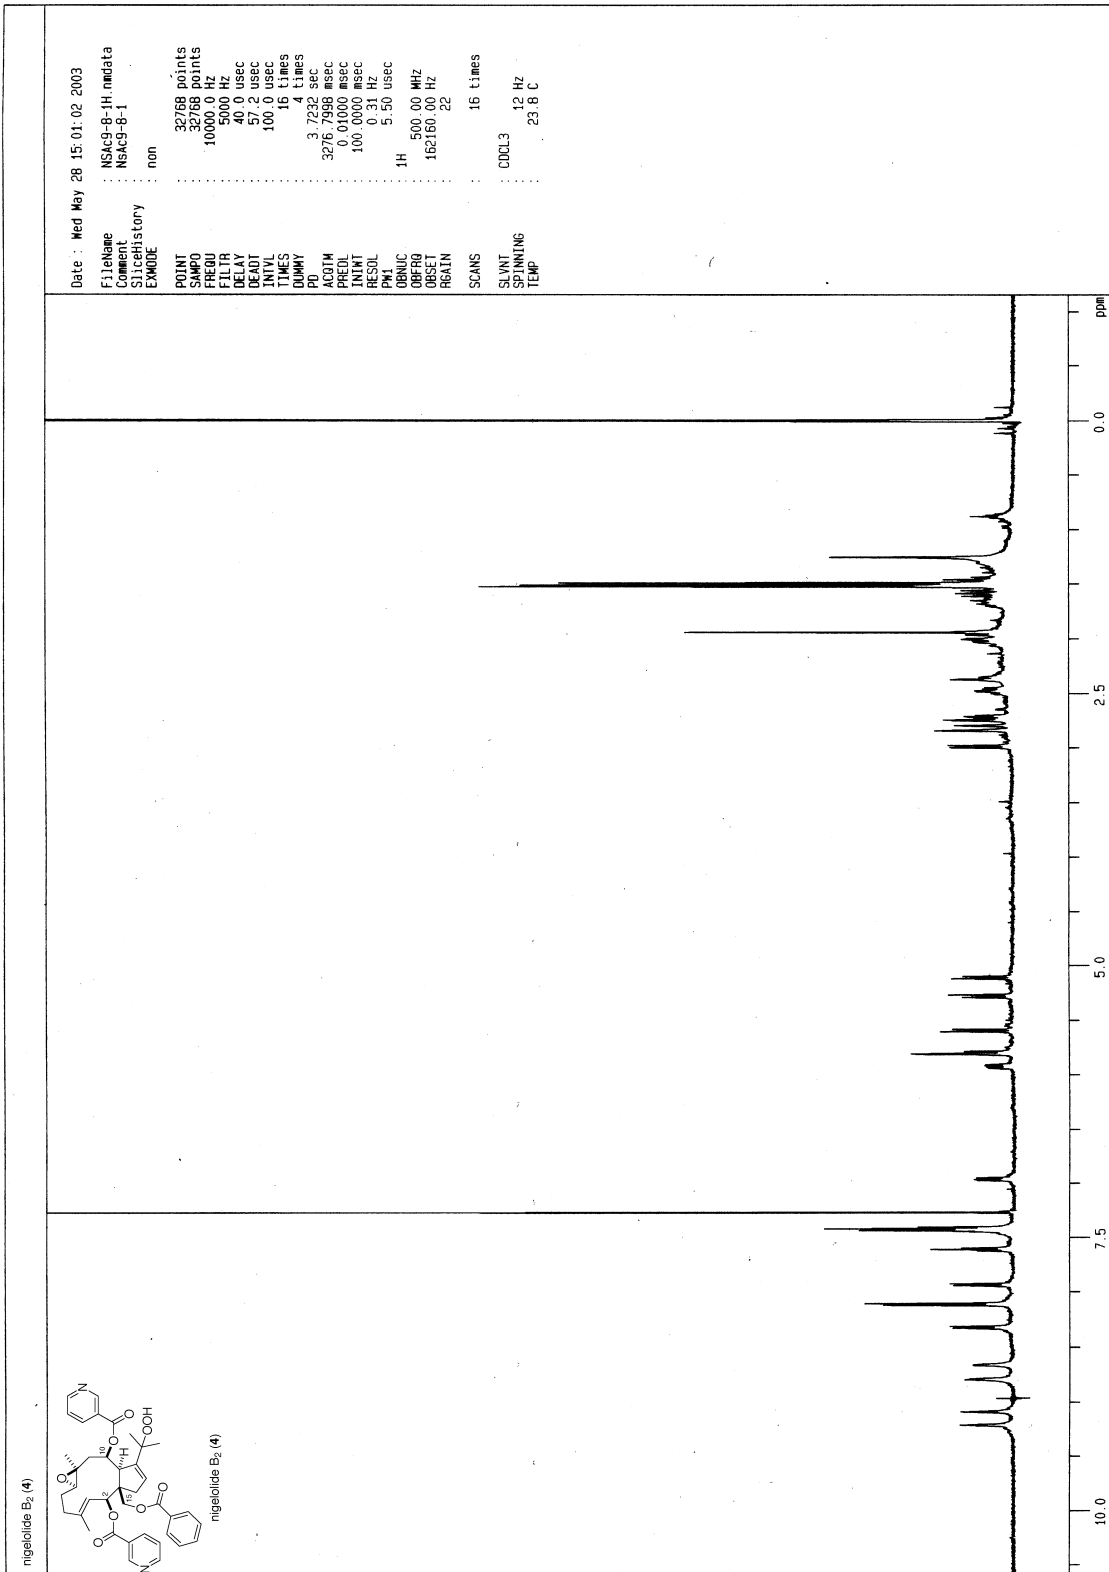

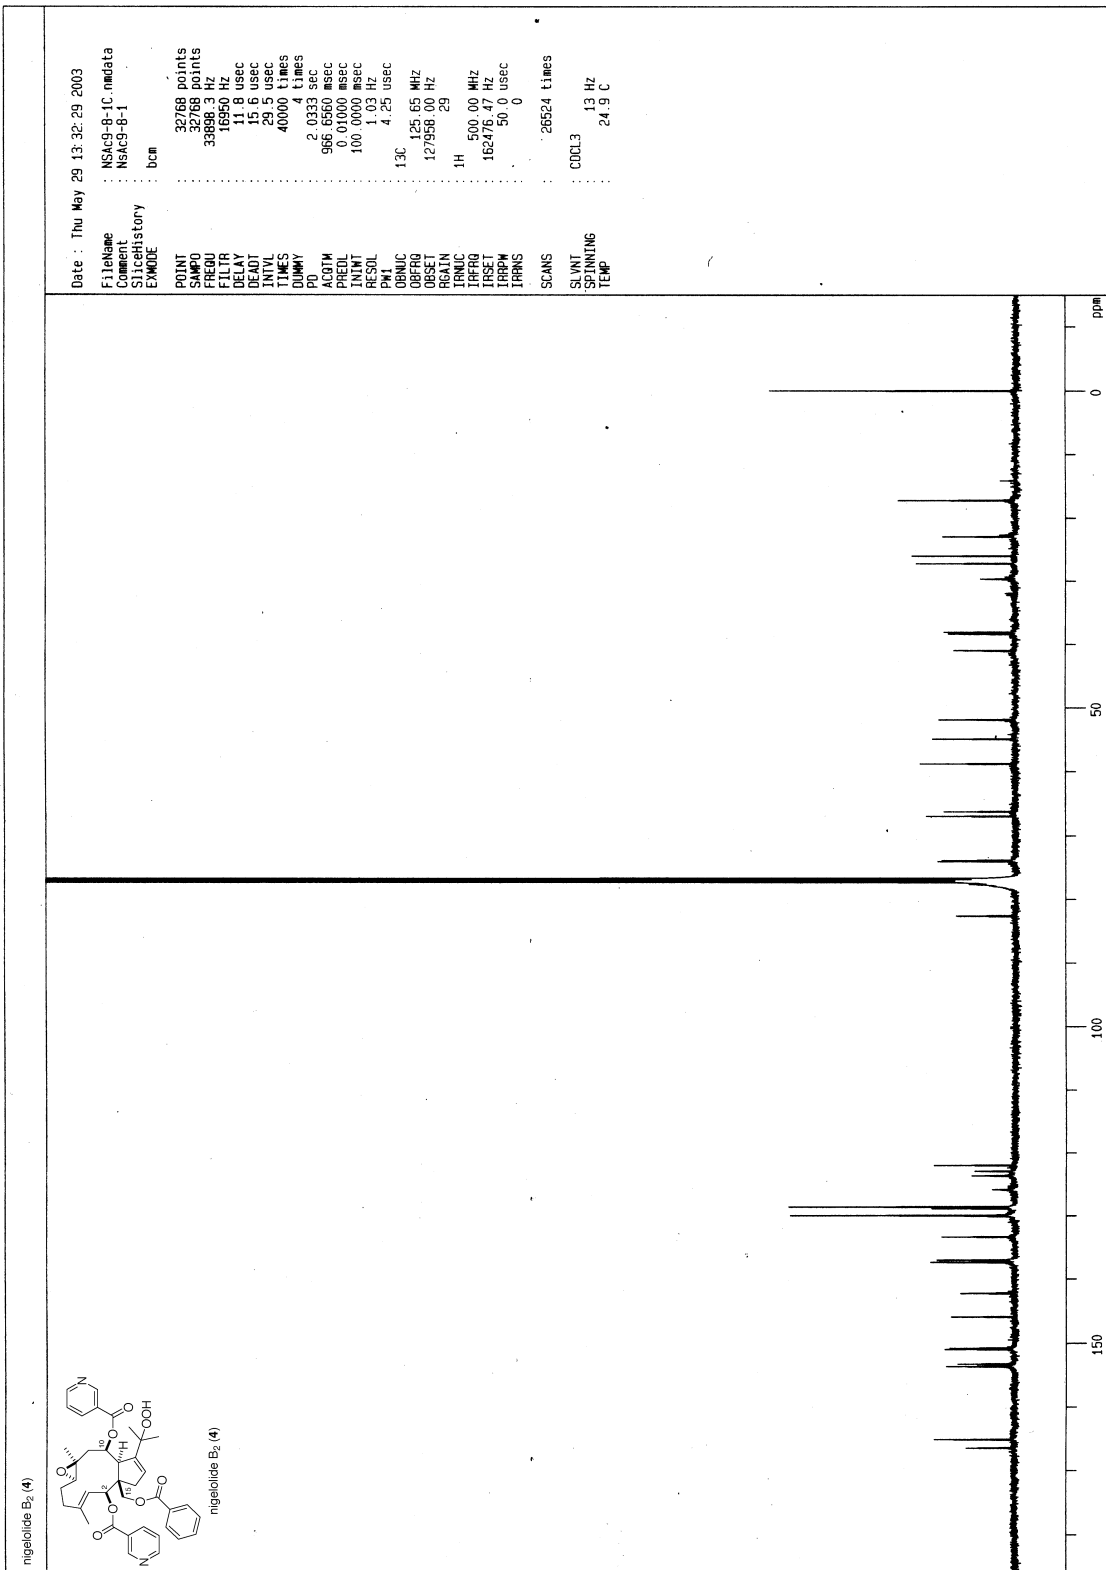

Supplement: Supplementary file 1 [file 5185261]
